# Supplementary material
Source: Elsevier journal article supplement (https://www.sciencedirect.com/science/article/pii/S0300289617300248)
Supplement: mmc1 [file S0300289617300248:mmc1.doc]

1. **Patogenia**

El desarrollo de enfermedad pulmonar tras exposición al asbesto, dependerá de la intensidad de esa exposición y del tamaño y características aerodinámicas de las fibras, así, los anfíboles tienen más capacidad para persistir alojadas en el pulmón1. Una vez en los alveolos, las fibras interactúan con las células del sistema inmune y alteran su función. Aunque en el proceso patogénico pueden intervenir múltiples células y sustancias químicas, estudios recientes2 se centran en las alteraciones en el macrófago alveolar (MA) y las células Natural Killer (NK) para explicar tanto la aparición de fibrosis como el mayor riesgo a presentar tumores. El MA en contacto con fibra de asbesto produce grandes cantidades de factor de crecimiento transformante beta y aumenta su actividad fibrogénica. Por otra parte la interacción con las células NK alterará su función citotóxica y permitirá que las células tumorales puedan escapar al control del sistema inmune. Otros autores han detectado además la capacidad de las fibras de asbesto para producir un daño directo en el ADN de las células inmunocompetentes relacionadas con la defensa antitumoral 3.

1. **Patología derivada de la exposición al asbesto**

2.1. Enfermedades no malignas producidas por exposición a asbesto

2.1.1. Enfermedad pleural

Las manifestaciones pleurales son las más frecuentes asociadas a la exposición a asbesto.

a/ Fibrosis pleural localizada o placas pleurales

Son lesiones colágenas bien circunscritas y frecuentemente calcificadas. Aumenta su prevalencia con el tiempo de exposición y con el tiempo de latencia, que suele ser de al menos 20 años. Se presentan en la pleura parietal, de forma bilateral en más de la mitad de los casos, son asimétricas, con predominio costal inferior en su parte posterior y sobre la parte tendinosa central del diafragma.

La identificación de las placas pleurales se suele llevar a cabo con la radiografía de tórax. Se visualizan como lesiones alargadas densas o de aspecto lineal de predominio en la pleura diafragmática. Suelen respetar los senos costofrénicos y los vértices. La proyección oblicua en ocasiones permite una mejor visualización. Pueden estar calcificadas.

La tomografía computarizada (TC) es más sensible para el diagnóstico y extensión de las mismas. Los pacientes suelen estar asintomáticos, y raramente presentan disnea o dolor torácico. La función pulmonar habitualmente es normal, sólo ocasionalmente se produce una restricción ventilatoria leve4. Habitualmente, presentan una progresión lenta no habiéndose descrito su malignización. Su mayor importancia radica en ser un marcador de exposición a asbesto, por lo que, dado que estos pacientes presentan una mayor probabilidad de desarrollar otras enfermedades por asbesto, se recomienda su seguimiento (Recomendación débil, calidad de evidencia baja).

b/ Fibrosis pleural difusa

Consiste en una fibrosis difusa de la pleura visceral, de entre 1 mm y 1 cm de grosor, que puede extenderse unos milímetros al parénquima pulmonar, se suele asociar con bandas fibrosas que penetran hacia el parénquima. Puede afectar a áreas extensas o a las cisuras, y son frecuentes las adherencias con la pleura parietal. Raramente afecta al vértice pulmonar. Se puede asociar a las placas pleurales. Su frecuencia aumenta con el tiempo e intensidad de la exposición y en pacientes con derrame pleural previo. Se suele manifestar transcurridos más de 20 años desde la exposición.

A diferencia de las placas pleurales, es frecuente que los pacientes presenten disnea. Funcionalmente se produce un patrón restrictivo5. El diagnóstico se lleva a cabo habitualmente mediante métodos de imagen, como la radiografía de tórax o la TC. Radiológicamente se define como un aumento del grosor pleural que afecta al menos a una cuarta parte de la pared torácica. Más frecuente unilateral, afecta principalmente a la pleura posterior a nivel de las bases y puede estar calcificada. Afecta frecuentemente los ángulos costofrénicos, lo que también la diferencia de las placas pleurales. En la TC se define como una zona de engrosamiento pleural de más de 5 cm de ancho, más de 8 cm de extensión craneocaudal y grosor mayor de 3 mm. Dado que resulta de la fibrosis de la pleura visceral puede aparecer asociada a bandas parenquimatosas o líneas en la periferia del pulmón que se dirigen perpendicularmente a la pleura engrosada así como a atelectasia redonda.

La mayoría de los pacientes permanecen estables o con disminución leve de la función pulmonar en su seguimiento, pero ocasionalmente produce restricción pulmonar grave, insuficiencia respiratoria hipercápnica, cor pulmonale y muerte.

c/ Derrame pleural por asbesto

Se trata de un exudado, habitualmente unilateral de volumen pequeño (menor del 25% del hemitórax)6. Más de la mitad son serosos o serohemáticos, y un tercio presenta eosinofilia. Puede aparecer incluso en los primeros 10 años tras el inicio del contacto con asbesto, aunque es más frecuente a partir de los 20 años. La mitad de los pacientes están asintomáticos, y en el resto, los síntomas más frecuentes son dolor torácico, febrícula, tos seca o disnea. El diagnóstico es de exclusión, y se recomienda un seguimiento de al menos 3 años que descarte la posibilidad de malignidad (Recomendación débil, calidad de evidencia baja). La biopsia pleural muestra una pleuritis inespecífica. Si el derrame es persistente, se debe valorar la realización de una toracoscopia diagnóstica.

El derrame suele desaparecer espontáneamente en unos 3 meses (rango entre 1-10 meses). Sin embargo, un tercio de los pacientes presentarán recidiva del mismo, y más de la mitad otras manifestaciones, como atelectasia redonda, fibrosis pleural difusa (20%), o mesotelioma pleural (5%).

d/ Atelectasia redonda

Es una forma de colapso pulmonar no segmentario y periférico que simula una neoplasia pulmonar o pleural. Se produce como consecuencia del plegamiento sobre sí mismo de una parte del pulmón, secundario a una afectación pleural. Si bien la causa más frecuente de la atelectasia redonda es la exposición al amianto (81-89%), no es la única7 ya que cualquier pleuritis con exudado pleural puede originarla8.

El diagnóstico se lleva a cabo mediante TC torácico de alta resolución (ya que en la radiografía de tórax se visualiza como una masa periférica) donde se objetiva como una opacidad redonda u ovalada de base pleural. Existe curvatura de los vasos pulmonares y bronquios adyacentes (signo de la cometa). Se presenta a menudo de forma unilateral y localizada en lóbulos inferiores y el diagnóstico diferencial más frecuente es con el cáncer de pulmón 9. Se caracteriza por su estabilidad en el tiempo a diferencia de las neoplasias. La presencia de hallazgos radiológicos poco frecuentes puede hacer necesarias más pruebas diagnósticas de imagen (Recomendación consistente, calidad de evidencia baja).

| CRITERIOS RADIOLÓGICOS DE ATELECTASIA REDONDA EN EL TCAR | HALLAZGOS RADIOLÓGICOS POCO FRECUENTES |
| --- | --- |
| -Masa redondeada o lenticular en contacto con la pleura.  -Engrosamiento pleural en contacto con la atelectasia redonda.  -Ángulo agudo entre la masa y la pleura.  -Signo de cola de cometa: Presencia de vasos y bronquios que convergen y parecen arremolinarse en torno a la masa  (signo casi patognomónico de atelectasia redonda). | -Atelectasias lobares y segmentarias sin alteraciones pleurales.  -“Pie de cuervo”: bandas lineales que irradian desde la masa hacia el parénquima pulmonar circundante.  -Reducción en el tamaño de la masa.  -Broncograma aéreo dentro de la masa.  - Presencia de fibrosis pleuroparenquimatosa asociada.  -Nódulo pulmonar. |

2.1.2. Asbestosis

Es una neumopatía intersticial difusa, con fibrosis, provocada por la inhalación de fibras de amianto. Se asocia con periodos prolongados de exposición, habitualmente entre 10 y 20 años, aunque se han descrito casos en los que exposiciones muy intensas desde un mes a un año de duración han sido suficientes para el desarrollo de la enfermedad. La asbestosis es más prevalente y más extensa, para un mismo nivel de exposición, en los fumadores. Los síntomas son muy inespecíficos, como tos seca y disnea de esfuerzo y a la exploración se detectan crepitantes tipo “velcro” en ambas bases pulmonares. En fases avanzadas aparece una insuficiencia respiratoria y los signos típicos de cor pulmonale.

En lo referente a las pruebas de función pulmonar, suele aparecer una alteración ventilatoria de tipo restrictivo, caracterizada por un descenso de la TLC y de la FVC con una relación FEV1/FVC ≥ de 0.7, aunque estos parámetros pueden ser normales en periodos iniciales de la enfermedad. La DLCO es una medida más sensible, aunque también inespecífico. Suele ser la primera en mostrar un descenso y no es habitual encontrar asbestosis con DLCO normal aunque puede aparecer en casos iniciales.

En la **radiografía simple de tórax** las anomalías iniciales de la asbestosis son pequeñas opacidades irregulares reticulares o más raramente en vidrio deslustrado, de predominio en bases. Las alteraciones pleurales no malignas como las placas pleurales y el engrosamiento pleural difuso se detectan hasta en el 50% de los casos de asbestosis y en formas evolucionadas aparece disminución del tamaño pulmonar, borramiento de los bordes cardíacos y del diafragma con extensión hacia los lóbulos superiores. Sus limitaciones son la falta de especificidad así como la limitada sensibilidad. En relación a la radiología simple, la **TCAR** ha añadido una mayor sensibilidad a la detección de la enfermedad tanto intersticial como pleural10. Permite detectar lesiones intersticiales tempranas y aporta además información que ayuda en la identificación de anomalías pleurales relacionadas con la exposición a asbesto.

| ASBESTOSIS | HALLAZGOS RADIOLÓGICOS TCAR |
| --- | --- |
|  | - Afectación reticular intralobulillar |
|  | - Engrosamiento de septos interlobulillares |
|  | - Opacidades lineales subpleurales |
|  | - Panal de abejas |
|  | - Afectación bilateral y periférica (habitualmente) |

Ninguno de estos hallazgos es específico ni patognomónico. Pueden no estar todos presentes de manera simultánea y ningún signo aislado es criterio radiológico de la enfermedad11-12.

Según los criterios de la ATS de 200413, el diagnóstico de asbestosis se basa en los siguientes hallazgos:

1- Evidencia de alteraciones estructurales sugestivas de afectación intersticial, bien por métodos radiológicos o anatomopatológicos.

2- Antecedente de cualquier tipo de exposición previa al amianto con un tiempo de latencia mayor a 5-10 años o, en caso de no constar en la historia laboral o clínica el antecedente de exposición al amianto, la presencia de marcadores de exposición como las placas pleurales o la presencia de cuerpos de asbesto en una muestra de tejido o de lavado broncoalveolar procesado para análisis mineralógico.

3- Exclusión de diagnósticos alternativos.

No es necesaria la alteración de las pruebas de función respiratoria para su diagnóstico (Recomendación consistente, calidad de evidencia moderada).

Tampoco se requiere una biopsia pulmonar para su diagnóstico, tan solo se reserva en caso de que haya dudas en el diagnóstico (Recomendación consistente, calidad de evidencia moderada). El diagnóstico diferencial se plantea fundamentalmente con la fibrosis pulmonar idiopática con un patrón de neumonía intersticial usual. Existen algunos hallazgos que permiten diferenciarlas como la presencia de afectación pleural, la menor profusión de focos de miofibroblastos y la presencia de cuerpos de asbesto, hallazgos que sugieren el diagnóstico. No existe un tratamiento eficaz de la asbestosis por lo que debe ser considerada como una enfermedad crónica y progresiva.

2.1.3. Otras patologías no malignas relacionadas

a/ Enfermedad de las vías aéreas

El amianto se ha considerado tradicionalmente causa de patrón ventilatorio restrictivo. Sin embargo su papel como causa de obstrucción bronquial ha sido y continúa siendo muy controvertido. A pesar de hallarse incluída esta patología en la guía de la ATS 200413, se cree que el efecto del asbesto en la vía aérea es relativamente pequeño. Así, desde el punto de vista histológico, se produce una inflamación y una fibrosis de las porciones distales de las paredes los bronquiolos membranosos y respiratorios, principal lugar de depósito del amianto. Este efecto, por sí solo, es poco probable que contribuya a los signos y síntomas que aparecen en la enfermedad pulmonar obstructiva crónica (EPOC), pero asociada a otras enfermedades como el tabaquismo puede ayudar a una mayor pérdida funcional.

b/ Fibrosis retroperitoneal

Se trata de una entidad rara en la que aparece proliferación de tejido fibroso en el área retroperitoneal que contiene los riñones, el tracto urinario, la aorta y otras estructuras. Puede ser idiopática o secundaria, entre otras causas, a exposición a asbesto.

La evidencia científica que apoya su papel etiológico es limitada, basándose exclusivamente en casos clínicos, 2 series de casos y un estudio controlado14. No obstante, a todos los pacientes diagnosticados de fibrosis retroperitoneal se les debería preguntar por el antecedente de exposición al asbesto como uno de los factores de riesgo.

c/ Pericarditis constrictiva

A pesar de figurar en el listado de enfermedades profesionales, es una entidad extremadamente rara de la que hay muy pocos casos publicados en la literatura en relación con la exposición a asbesto. El diagnóstico se basa en la presencia de signos de insuficiencia cardiaca derecha, la demostración de la constricción mediante ecocardiografía y la confirmación de hallazgos morfológicos mediante resonancia magnética o TC.

2.2. Enfermedades malignas producidas por exposición a asbesto

2.2.1. Carcinoma broncogénico

Es la primera causa de mortalidad por cáncer en nuestro país 15. La exposición a asbesto constituye un factor de riesgo bien establecido para desarrollarlo. En un reciente estudio en trabajadores de aislamientos, el asbesto aumentó el riesgo de cáncer de pulmón, la coincidencia de tabaquismo y exposición a asbesto supuso un riesgo aditivo, y si además existía asbestosis, el efecto fue supraaditivo16. La mayoría de los estudios se centran así, en 2 hipótesis: si el efecto de la combinación de exposición a asbesto es aditivo al tabaquismo o multiplicativo.

Desde el punto de vista clínico y de imagen, el cáncer de pulmón en pacientes expuestos a asbesto no se distingue del cáncer en los no expuestos. No hay evidencia científica de mayor predominio en lo que se refiere a localización o estirpe histológica.

En la actualidad, se sabe que, si bien el cáncer es más prevalente y el riesgo mayor en pacientes con asbestosis, existe un riesgo indudable en pacientes sin asbestosis. Del mismo modo, frente a la creencia previa de que sólo los anfíboles pueden causar el cáncer, se admite que el crisotilo tiene también poder carcinogénico17. Asimismo se desconoce si el cáncer de pulmón en pacientes expuestos a asbesto tiene alguna diana terapéutica diferencial.

2.2.2. Mesotelioma

Tumor maligno que se origina a partir de las células mesoteliales que recubren las cavidades serosas. Según su localización puede ser: pleural, pericárdico, peritoneal o de la túnica vaginalis; en todos ellos el principal factor etiológico es la exposición al asbesto. El más frecuente es el **pleural** (MM).

La incidencia del MM aumenta con una mayor exposición, pero no hay un dintel mínimo de seguridad. Todas las fibras de asbesto se han asociado a este tumor. Se caracteriza por un tiempo de latencia muy prolongado de más de 20 años pero que puede llegar a ser de más de 50. En España, la mortalidad ha aumentado hasta la década actual, y se prevé que sigan produciéndose muertes por contacto laboral al menos hasta 204018. No se relaciona con el tabaquismo. La clasificación histológica fundamental incluye los tipos epitelial, sarcomatoso y mixto, con numerosos subtipos19.

Los pacientes suelen presentar dolor torácico o disnea. En la mayoría de los casos tienen derrame pleural (exudado, frecuentemente con glucosa y pH bajos) o masa pleural (20%).

Cuando la enfermedad avanza se produce un progresivo engrosamiento pleural, frecuentemente nodular, que típicamente afecta a la pleura mediastínica, y que en su evolución encapsula de forma circunferencial al pulmón. Aunque muchos casos se detectan mediante Rx tórax, la cual suele evidenciar engrosamiento pleural unilateral que envuelve al pulmón y que se asocia en la mayoría de los casos a un derrame pleural, hay hasta un 25% donde se identifican masas pleurales sin derrame. La TC aporta más claridad y precisión de las lesiones además de ser útil para la estadificación. Es frecuente la visualización de placas pleurales reflejo de la exposición a asbesto20.

Para el diagnóstico son imprescindibles muestras histológicas de buen tamaño por lo que se aconseja la biopsia por toracoscopia o quirúrgica. Se han descrito criterios histológicos e inmunohistoquímicos para su diferenciación de la hiperplasia mesotelial, o de otros tumores. Se recomienda para la confirmación diagnóstica histológica la utilización de al menos 2-3 marcadores inmunohistoquímicos epiteliales y un número similar de marcadores mesoteliales (Recomendación consistente, calidad de evidencia moderada). La combinación más adecuada de dichos marcadores depende del tumor con el que se necesite realizar el diagnóstico diferencial21.

Se recomienda utilizar la estadificación propuesta por primera vez por el International Mesothelioma Interest Group en 1995, derivada del sistema TNM, sobre la que se han propuesto potenciales modificaciones22 (Recomendación consistente, calidad de evidencia baja). La estadificación puede incluir la realización de más pruebas diagnósticas, especialmente si el paciente va a ser candidato a terapia multimodal (Resonancia Magnética, PET, PET-TC, laparoscopia, etc)23. Los pacientes tienen una mediana de supervivencia entre 6 y 12 meses, y se han descrito multitud de factores pronósticos, entre los que destacan el tipo histológico (mejor supervivencia en la variedad epitelial), edad y el estado general.

No hay consenso sobre el tratamiento, que debe contemplar un abordaje multimodal. La quimioterapia que incluye una combinación de platino y pemetrexed ha demostrado un aumento de supervivencia (Recomendación consistente, calidad de evidencia alta). Actualmente se tiende a ofrecer una cirugía conservadora, con pleurectomía/decorticación a los pacientes con mejor situación clínica y estadios menos avanzados24 (Recomendación consistente, calidad de evidencia baja).

2.2.3. Otras neoplasias

Aunque con menos nivel de evidencia que en el cáncer de pulmón o el mesotelioma, la exposición al asbesto se ha relacionado con un mayor riesgo de aparición de tumores malignos en otras localizaciones. Así, la “International Agency For Research of Cancer” considera que hay un vínculo etiológico claramente establecido entre la exposición a asbestos y la aparición de tumores en laringe y ovario, y que hay una asociación positiva entre dicha exposición y la aparición de tumores digestivos (faringe, esófago, estómago, colon y recto)25.

1. **Nuevas fibras**

Aunque no sean fibras de amianto, por su semejanza con éstas, trataremos puntualmente las fibras de vidrio y las nanofibras.

Las fibras de vidrio se consideran respirables cuando se presentan en lanas26. Éstas se utilizan ampliamente en aislamientos, tanto aeroespacial como naval (ha sustituido al amianto blanco). Tienen diámetro <1 micra. La nº 475 y la E son más biopersistentes y se ha observado que la nº475 produce mesotelioma en ratones.

A las nanofibras se las conoce también como nanotubos, carbón nanotubos (NTC) o biomateriales. Son compuestos de 6 átomos de carbono estructurados en 1 capa (SWCNT) o varias (MWCNT). Aunque las nanopartículas se definen por un tamaño <100 nanómetros, los nanotubos, dependiendo de su estructura y de los elementos inorgánicos que tienen asociados, tienen diferentes capacidades y tamaños. Éste oscila entre 1 ó varios nanómetros de ancho hasta varias micras de longitud. Por tanto, son estructuralmente similares a las fibras de amianto. Se utilizan ampliamente en la industria (composites) y se han asociado a asma atópica y a fibrosis pulmonar y mesotelioma en ratones y también a la aparición de placas peurales en humanos. No han comenzado a usarse como biomateriales (en humanos) por sus potenciales efectos secundarios aún en estudio27.

BIBLIOGRAFIA

1. Roggli VL, Gibbs AR, Attanoos R, Churg A, Popper H, Cagle P, et al.Pathology of asbestosis- An update of the diagnostic criteria: Report of the asbestosis committee of the college of american pathologists and pulmonary pathology society. Arch Pathol Lab Med. 2010 ;134:462–80.

2. Nishimura Y, Maeda M, Kumagai-Takei N, Lee S, Matsuzaki H, Wada Y, et al. Altered functions of alveolar macrophages and NK cells involved in asbestos-related diseases. Environ Health Prev Med. 2013;18:198–204.

3. Matsuzaki H, Maeda M, Lee S, Nishimura Y, Kumagai-Takei N, Hayashi H, et al. Asbestos-induced cellular and molecular alteration of immunocompetent cells and their relationship with chronic inflammation and carcinogenesis. J Biomed Biotechnol. 2012; 2012: 492608

4. Clark KA, Flynn JJ 3rd, Goodman JE, Zu K, Karmaus WJJ, Mohr LC. Pleural plaques and their effect on lung function in Libby vermiculite miners. Chest. 2014;146:786–94.

5. Fishwick D, Barber CM. Non-malignant asbestos-related diseases: a clinical view. Clin Med. 2014; 14:68–71.

6. Ferrer J, Balcells E, Orriols R, Villarino MA, Drobnic Z, Morell F. Derrame pleural benigno por asbesto. Descripción de la primera serie en España. Med Clin. 1996; 107:535-8.

7. Hillerdal G. Rounded atelectasis. Clinical experience with 74 patients. Chest. 1989; 95:836–41.

8. Bloom CI, Wilson GE. Rounded atelectasis and respiratory compromise secondary to pergolide use. Respirology. 2009; 14:906–7.

9. Gevenois PA, De Vuyst P VWR. Tomodensitometries des pathologies thoraciques de l´amiante. Rev Im Med. 1991; 3:471–80.

10. Lynch DA. CT for asbestosis: value and limitations. AJR Am J Roentgenol. 1995; 164:69–71.

11. Gevenois PA, de Maertelaer V, Madani A, Winant C, Sergent G, De Vuyst P. Asbestosis, pleural plaques and diffuse pleural thickening: three distinct benign responses to asbestos exposure. Eur Respir J. 1998 ; 11:1021–7.

12. Peacock C, Copley SJ, Hansell DM. Asbestos-related benign pleural disease. Clin Radiol. 2000; 55:422–32.

13. American Thoracic Surgery. Diagnosis and initial management of nonmalignant diseases related to asbestos. Am J Respir Crit Care Med. 2004;170:691–715.

14. Goldoni M, Bonini S, Urban ML, Palmisano A, De Palma G, Galletti E, Coggiola M, Buzio C, Mutti A, Vaglio A. Asbestos and smoking as risk factors for idiopathic retroperitoneal fibrosis: a case-control study. Ann Intern Med. 2014; 161:181-8.

15. Ferlay J, Steliarova-Foucher E, Lortet-Tieulent J, Rosso S, Coebergh JWW, Comber H, et al. Cancer incidence and mortality patterns in Europe: estimates for 40 countries in 2012. Eur J Cancer. 2013; 49:1374–403.

16. Markowitz SB, Levin SM, Miller A, Morabia A. Asbestos, asbestosis, smoking, and lung cancer. New findings from the North American insulator cohort. Am J Respir Crit Care Med. 2013; 188:90–6.

17. Loomis D, Dement JM, Wolf SH, Richardson DB. Lung cancer mortality and fibre exposures among North Carolina asbestos textile workers. Occup Environ Med. 2009; 66:535–42.

18. López-Abente G, García-Gómez M, Menéndez-Navarro A, Fernández-Navarro P, Ramis R, García-Pérez J, et al. Pleural cancer mortality in Spain: time-trends and updating of predictions up to 2020. BMC cancer. 2013; 13:528.

19. Travis WD, Brambilla E, Muller-Hermelink HK, *et al*, eds. World Health Organization Classification of Tumours. Pathology and Genetics. Tumours of the Lung, Pleura, Thymus and Heart. Lyon, IARC, 2004

20. Greillier L, Astoul P. Mesothelioma and asbestos-related pleural diseases. Respiration. 2008; 76:1–15.

21. Husain AN, Colby T, Ordonez N, Krausz T, Attanoos R, Beasley MB, et al. Guidelines for pathologic diagnosis of malignant mesothelioma: 2012 update of the consensus statement from the International Mesothelioma Interest Group. Arch Pathol Lab Med. 2013; 137:647–67.

22. Rusch VW, Giroux D. Do we need a revised staging system for malignant pleural mesothelioma? Analysis of the IASLC database. Ann Cardiothorac Surg. 2012; 1:438–48.

23. Scherpereel A, Astoul P, Baas P, Berghmans T, Clayson H, de Vuyst P, et al. Guidelines of the European Respiratory Society and the European Society of Thoracic Surgeons for the management of malignant pleural mesothelioma. Eur Respir J. 2010; 35:479–95.

24. Van Schil PE, Opitz I, Weder W, De Laet C, Domen A, Lauwers P, et al. Multimodal management of malignant pleural mesothelioma: where are we today? Eur Respir J. 2014:44:754–64.

25. Straif K, Benbrahim-Tallaa L, Baan R, Grosse Y, Secretan B, El Ghissassi F, et al. A review of human carcinogens--part C: metals, arsenic, dusts, and fibres. Lancet Oncol 2009; 10:453–4.

26. Costa R, Orriols R. Fibras minerals y aparato respiratorio. Arch Bronconeumol. 2012;48:460–8.

27. Saito N, Haniu H, Usui Y, Aoki K, Hara K, Takanashi S, et al. Safe clinical use of carbon nanotubes as innovative biomaterials. Chem Rev. 2014;114(11):6040–79.

**ANEXO I: Legislación aplicable**

Orden de 7/12/2001. Modifica el anexo I del Real Decreto 1406/1989, sobre limitaciones a la comercialización y al uso de ciertas sustancias y preparados peligrosos.

Ley 31/1995, de Prevención de Riesgos Laborales. 10/11/1995.

Real Decreto Legislativo 1/1994, Texto Refundido de la Ley General de la Seguridad Social. 29/06/1994.

Real Decreto 39/1997, Reglamento de los Servicios de Prevención. 31/03/1997

Real Decreto 396/2006, disposiciones mínimas de seguridad y salud aplicables a los trabajos con riesgo de exposición al amianto. 11/04/2006.

Real Decreto 1299/2006, Cuadro de enfermedades profesionales en el sistema de la Seguridad Social y criterios para su notificación y registro. 19/12/2006.

Real Decreto 843/2011, por el que se establecen los criterios básicos sobre la organización de recursos para desarrollar la actividad sanitaria de los servicios de prevención. 4/7/2011.

Reglamento Comisión Europea (CE) nº 552/2009, de 22 de junio, que modifica el Reglamento nº 1907/2006, del Parlamento Europeo y del Consejo, relativo al registro, la evaluación, la autorización y la restricción de las sustancias y preparados químicos (REACH), en lo que concierne al Anexo XVII.

**ANEXO II: Real Decreto 1299/2006. Actividades profesionales relacionadas con la inhalación de polvos de amianto.**

-Demolición de construcciones o elementos (maquinaria o utillaje) donde exista amianto o materiales que lo contengan.

-Retirada de amianto, o de materiales que lo contengan, de equipos, unidades (como barcos, vehículos, o trenes), instalaciones, estructuras o edificios.

-Mantenimiento y reparación de los materiales con amianto existentes en equipos, unidades, instalaciones, estructuras o edificios.

-Transporte, tratamiento y destrucción de residuos que contengan amianto.

-Vertederos autorizados para residuos de amianto.

-Extracción, manipulación y tratamiento de minerales o rocas amiantíferas.

-Fabricación de tejidos, cartones y papeles de amianto.

-Tratamiento preparatorio de fibras de amianto (cardado, hilado, tramado, etc.).

-Aplicación de amianto a pistola (chimeneas, automóviles y vagones).

-Aislamiento térmico en construcción naval y de edificios y su destrucción.

-Fabricación de guarniciones para frenos y embragues, productos de fibrocemento, equipos contra incendios, filtros, cartón, y juntas, de amianto.

-Carga, descarga o transporte de mercancías que pudieran contener fibras de amianto.

-Todas aquellas otras actividades u operaciones en las que se manipulen materiales que contengan amianto, siempre que exista riesgo de liberación de fibras de amianto al ambiente de trabajo.
